# Supplementary material for: Efficacy of a Mobile Social Networking Intervention in Promoting Physical Activity: Quasi-Experimental Study
Source: PubMed Central journal article supplement (PMC6458538; doi:10.2196/12181), 2019-03-28
Supplement: mhealth_v7i3e12181_app1.pdf [file mhealth_v7i3e12181_app1.pdf]

# Appendix 1: Screenshots of fit.healthy.me app

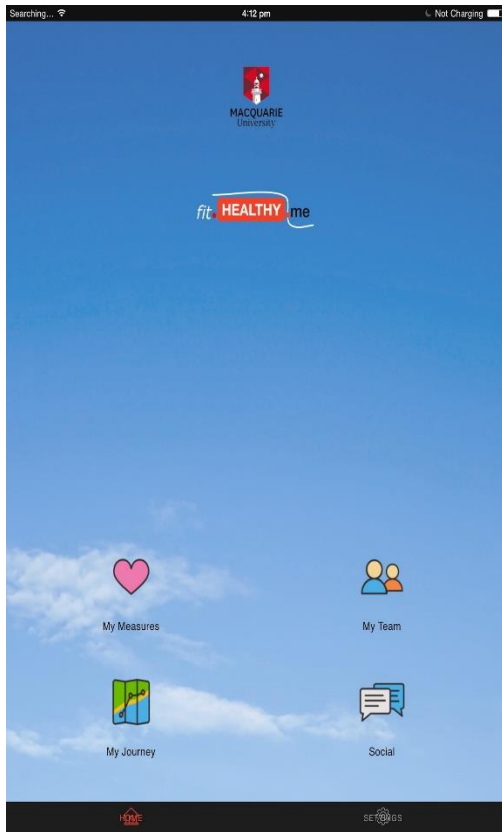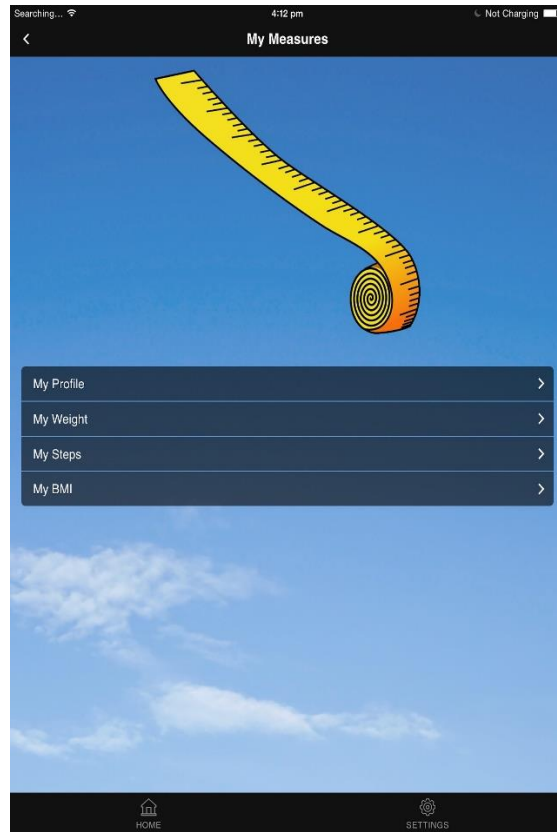

a) Homepage

b) My measures

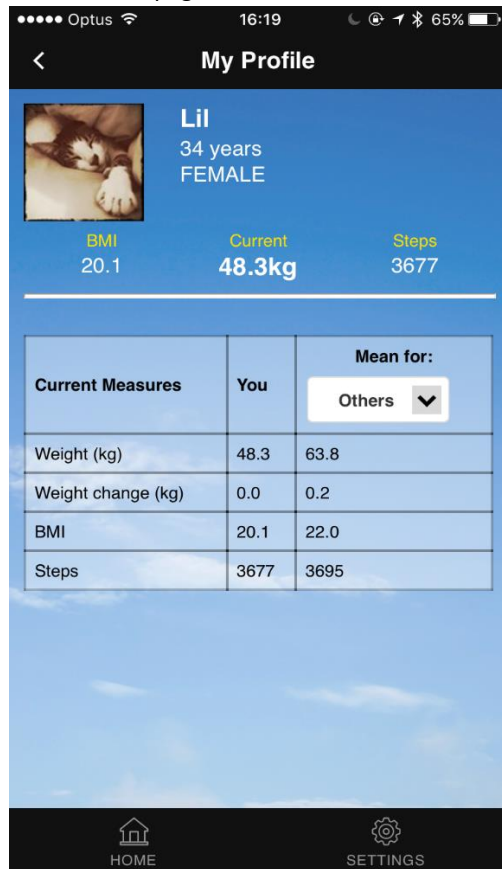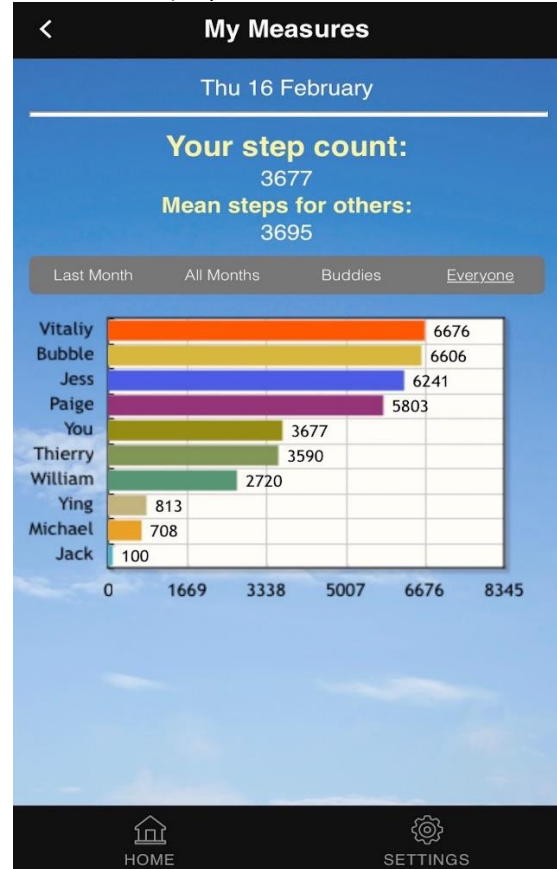

c) Social comparison features
