# Supplementary material for: Efficacy of a Mobile Social Networking Intervention in Promoting Physical Activity: Quasi-Experimental Study
Source: PubMed Central journal article supplement (PMC6458538; doi:10.2196/12181), 2019-03-28
Supplement: mhealth_v7i3e12181_app3.pdf [file mhealth_v7i3e12181_app3.pdf]

**Appendix 3:** Boxplots of the 55 participants' daily step count over 26 study weeks

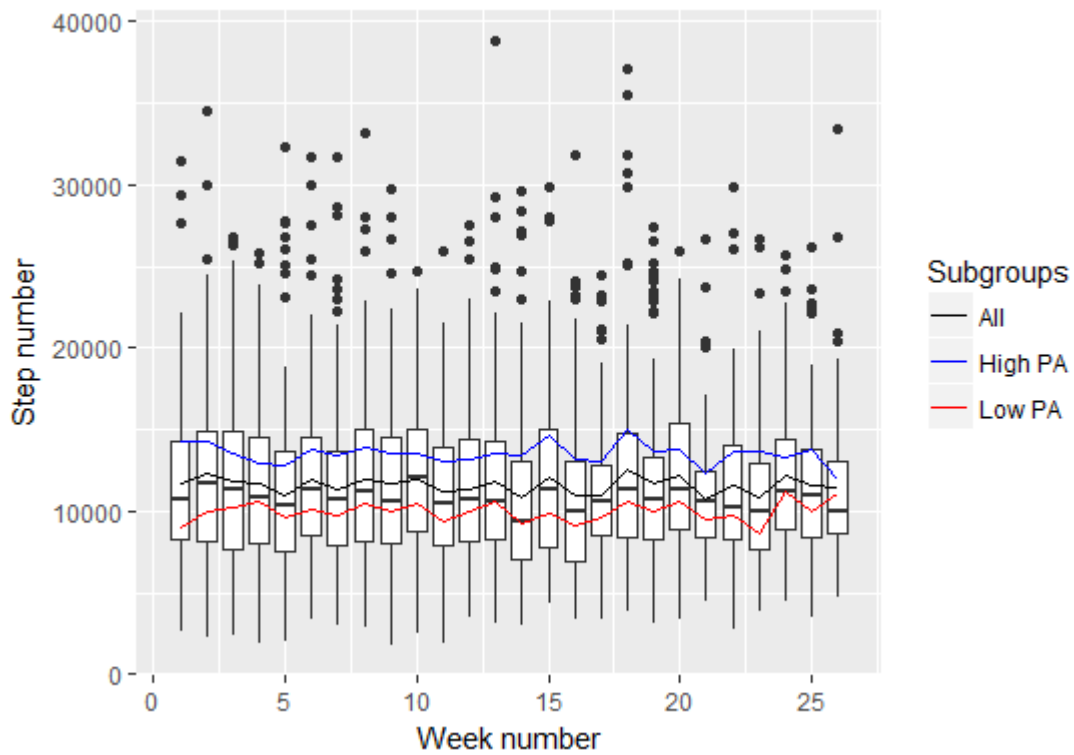

**Abbreviations:** PA: physical activity. **Notes:** A 'high' physical activity level was defined as having at least 10,000 steps per day on average for the first week, while a 'low' physical activity level was defined as having less than 10,000 steps per day on average during the first week.
